# Supplementary material
Source: PubMed Central journal article supplement (PMC4894502)
Supplement: NIHMS789077-supplement-ESM_Table_1.pdf [file NIHMS789077-supplement-ESM_Table_1.pdf]

## Electronic supplementary material

**ESM Table 1** Assay On Demand gene expression primer pair and probes from Applied Biosystems

| Gene symbol     | Gene name                                                            | Applied Biosystems assay ID |
|-----------------|----------------------------------------------------------------------|-----------------------------|
| <i>ACADM</i>    | Acyl-CoA dehydrogenase                                               | Hs00163494_m1               |
| <i>ADIPOR1</i>  | Adiponectin receptor 1                                               | Hs00360422_m1               |
| <i>ADIPOR2</i>  | Adiponectin receptor 2                                               | Hs00226105_m1               |
| <i>COX6C</i>    | Cytochrome <i>c</i> oxidase subunit VIc                              | Hs00269977_m1               |
| <i>CPT1B</i>    | Carnitine palmityl transferase I                                     | Hs00189258_m1               |
| <i>CREB1</i>    | cAMP response element binding protein                                | Hs00231713_m1               |
| <i>HADH</i>     | $\beta$ -Hydroxyacyl-CoA dehydrogenase                               | Hs00264758_m1               |
| <i>IDH3B</i>    | Isocitrate dehydrogenase 3 (NAD <sup>+</sup> ) beta                  | Hs00199382_m1               |
| <i>MEF2C</i>    | Myocyte enhancer factor 2C                                           | Hs00231149_m1               |
| <i>NDUFA5</i>   | NADH dehydrogenase (ubiquinone) 1-alpha subcomplex, 5                | Hs00606273_m1               |
| <i>NQO1</i>     | NAD(P)H dehydrogenase, quinine 1                                     | Hs01045993_g1               |
| <i>NRF1</i>     | Nuclear respiratory factor 1                                         | Hs00602161_m1               |
| <i>NRF-2</i>    | Nuclear respiratory factor 2                                         | Hs01022023_m1               |
| <i>PPARGC1A</i> | Peroxisome proliferator-activated receptor-gamma coactivator 1-alpha | Hs00173304_m1               |
| <i>PPARGC1B</i> | Peroxisome proliferator-activated receptor-gamma coactivator 1-beta  | Hs00370186_m1               |
| <i>PPARA</i>    | Peroxisome proliferator-activated receptor alpha                     | Hs00231882_m1               |
| <i>PPARD</i>    | Peroxisome proliferator-activated receptor delta                     | Hs00602622_m1               |
| <i>PPARG</i>    | Peroxisome proliferator-activated receptor gamma                     | Hs01115512_m1               |
| <i>SIRT1</i>    | Sirtuin 1                                                            | Hs01009003_m1               |
| <i>SOD2</i>     | Superoxide dismutase 2                                               | Hs00167309_m1               |
